# Supplementary material for: Withania somnifera Root Extract Enhances Chemotherapy through ‘Priming’
Source: PubMed Central journal article supplement (PMC5271386; doi:10.1371/journal.pone.0170917), 2017-01-27
Supplement: pone.0170917.s002.pdf [file pone.0170917.s002.pdf]

**Supporting Information for: *Withania Somnifera* Root Extract Enhances Chemotherapy Through ‘Priming’**

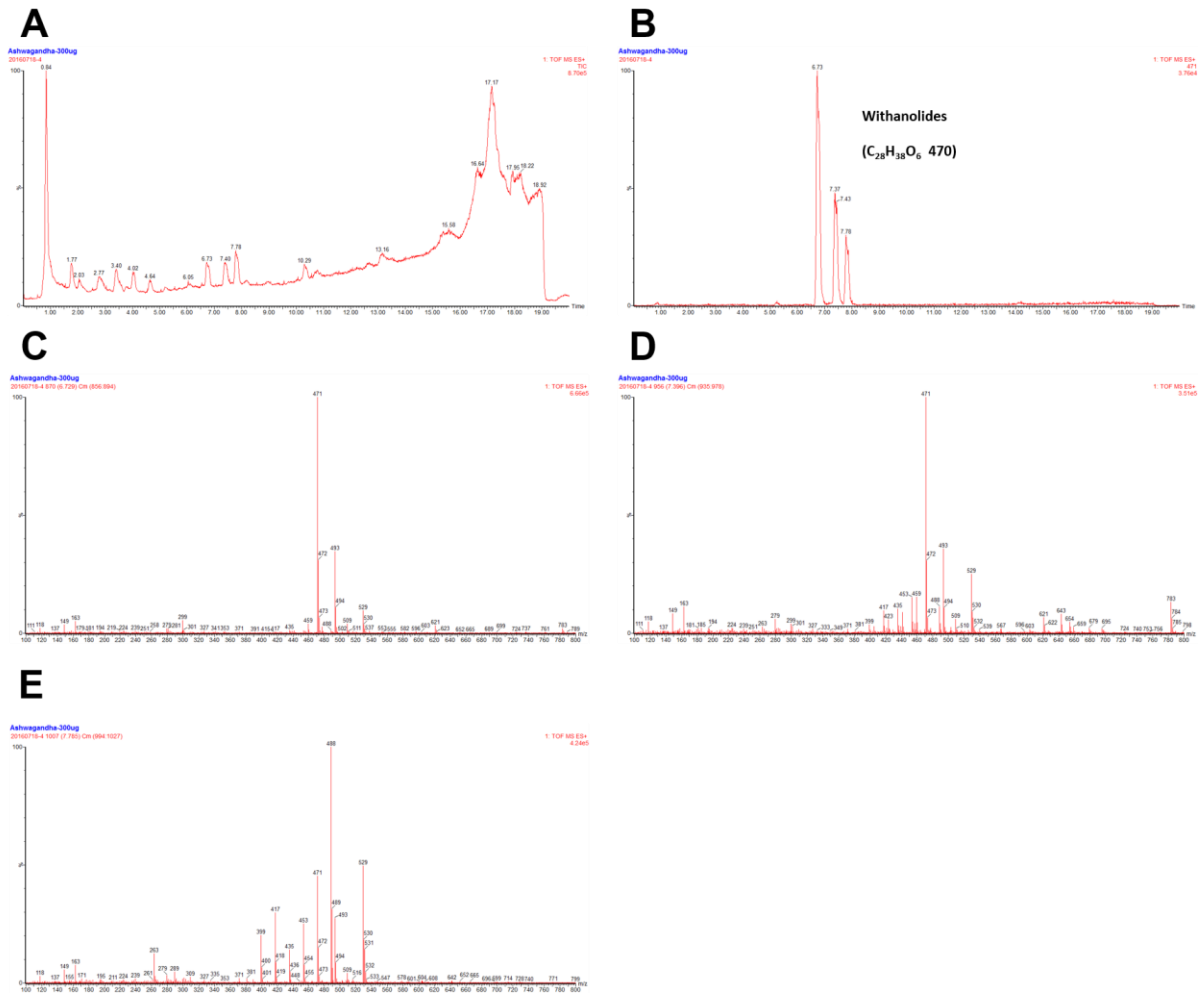

**Figure S2. HPLC-MS/MS data (A) Ashwagandha root extract total ion chromatogram, (B) Ashwagandha root extract 471 [M+H]<sup>+</sup> ion chromatogram, (C) Withanolide, peak 1 mass spectrum, (D) Withanolide, peak 2 mass spectrum, (E) Withanolide, peak 3 mass spectrum.**
