# Supplementary material for: Withania somnifera Root Extract Enhances Chemotherapy through ‘Priming’
Source: PubMed Central journal article supplement (PMC5271386; doi:10.1371/journal.pone.0170917), 2017-01-27
Supplement: pone.0170917.s003.pdf [file pone.0170917.s003.pdf]

**Supporting Information for: *Withania Somnifera* Root Extract Enhances Chemotherapy Through ‘Priming’**

**A MDA-MB231**

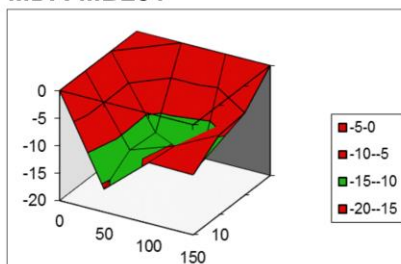

| MDA-MB231 |    |        |        |        |              |           |
|-----------|----|--------|--------|--------|--------------|-----------|
| 10        | 0  | -15.84 | -8.95  | -9.12  | SYNERGY PLOT |           |
| 5         | 0  | -12.35 | -9.56  | -5.51  | SYNERGY      | 0         |
| 1         | 0  | -12.77 | -16.43 | -5.06  | 95% CI       | NS        |
| 0         | 0  | 0      | 0      | 0      | ANTAGONISM   | -95.59    |
| 0         | 50 | 100    | 150    | 95% CI |              | -2 - -189 |

**B HT-29**

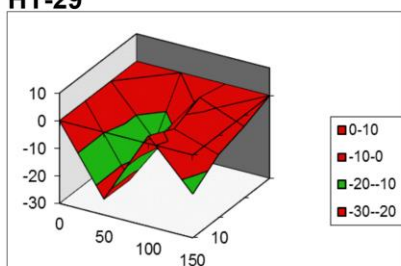

| HT-29 |    |        |       |        |              |          |
|-------|----|--------|-------|--------|--------------|----------|
| 10    | 0  | -24.28 | 2.77  | -14.16 | SYNERGY PLOT |          |
| 5     | 0  | -24.48 | -1.91 | -7.11  | SYNERGY      | 5.09     |
| 1     | 0  | -17.6  | 2.32  | -4.07  | 95% CI       | NS       |
| 0     | 0  | 0      | 0     | 0      | ANTAGONISM   | -93.61   |
| 0     | 50 | 100    | 150   | 95% CI |              | 0 - -187 |

**C MCF10A**

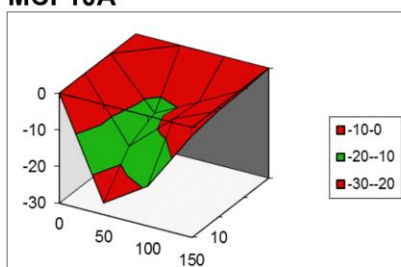

| MCF10A |    |        |       |        |              |            |
|--------|----|--------|-------|--------|--------------|------------|
| 10     | 0  | -26.83 | -19.1 | -2.21  | SYNERGY PLOT |            |
| 5      | 0  | -16.78 | -6.23 | -0.97  | SYNERGY      | 0          |
| 1      | 0  | -13.21 | -7.02 | -0.65  | 95% CI       | NS         |
| 0      | 0  | 0      | 0     | 0      | ANTAGONISM   | -93        |
| 0      | 50 | 100    | 150   | 95% CI |              | -13 - -173 |

**Figure S3. Evaluating the drug-drug interactions upon combining treatments of *W. somnifera* and cisplatin.**

The interactions of *W. somnifera* and cisplatin was assessed by the methods described in Prichard and Shipman (29). Cell viability was examined following treatment with *W. somnifera* root extract (0 µg/mL -10 µg/mL) in combination with cisplatin (0 µM -150 µM). **(A)** MDA-MB231, **(B)** HT-29 **(C)** MCF10A 3D models and data table sets represent the antagonist effect of the drug-drug interactions. Data represents the average of 5 independent experiments.
