# Supplementary material for: Withania somnifera Root Extract Enhances Chemotherapy through ‘Priming’
Source: PubMed Central journal article supplement (PMC5271386; doi:10.1371/journal.pone.0170917), 2017-01-27
Supplement: pone.0170917.s004.pdf [file pone.0170917.s004.pdf]

**Supporting Information for: *Withania Somnifera* Root Extract Enhances Chemotherapy Through ‘Priming’**

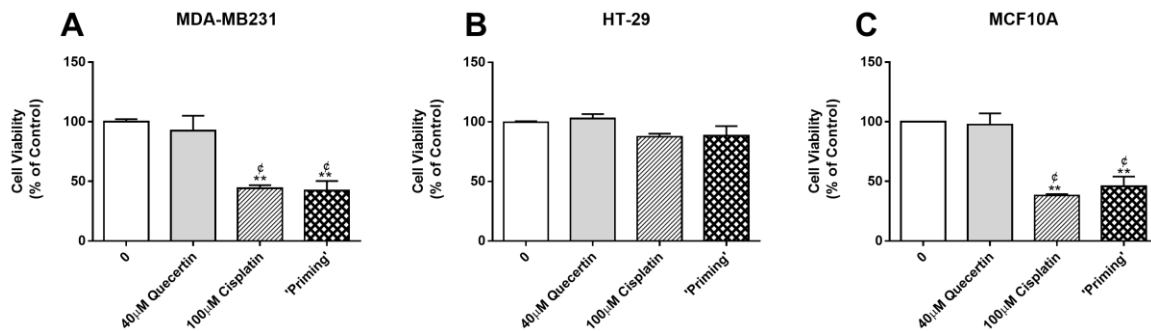

**Figure S4. The effect of ‘priming’ with Quercetin prior to cisplatin treatment on cell viability.** Cell viability was examined following treatment with quercetin (40 μM), cisplatin (100 μM) and ‘priming’ with quercetin prior to cisplatin treatment. **(A)** MDA-MB231, **(B)** HT-29 **(C)** MCF10A cell viability following treatments. Data represents the average of 3 independent experiments  $\pm$  SEM. \*\*  $p < 0.01$  vs non-treatment,  $\phi$   $p < 0.05$  vs Quercetin.
